# Supplementary material
Source: PubMed Central journal article supplement (PMC2999004)
Supplement: nl103754z_si_001.pdf [file nl103754z_si_001.pdf]

# Reversible and controllable nano-locomotion of an RNA-processing machinery

Gwangrog Lee<sup>1</sup>, Sophia Hartung<sup>3,4</sup>, Karl-Peter Hopfner<sup>3</sup> and Taekjip Ha<sup>1,2</sup>

<sup>1</sup>Department of Physics, University of Illinois at Urbana-Champaign, 1110 West Green Street, Urbana, Illinois 61801, USA

<sup>2</sup>Howard Hughes Medical Institute, Urbana, Illinois 61801, USA

<sup>3</sup>Munich Center for Advanced Photonics and Center for Integrated Protein Sciences, Department of Chemistry and Biochemistry, Gene Center, Ludwig-Maximilians-University Munich, Feodor-Lynen-Strasse 25, D-81377 Munich, Germany

<sup>4</sup>Present address: Life Science Division, Advanced Light Source, Lawrence Berkeley National Laboratory, Berkeley, California 94720, USA.

## Supporting Information

### SI Text

#### SI Methods and Materials:

#### RNA/DNA hybrid-construct preparation.

An 18-nt DNA strand was purchased from Integrated DNA Technologies and RNA strands from Dharmacon Inc. RNA and DNA strands were annealed by mixing at the ratio of 1 to 1.2, heating up to 80C, and cooling down slowly to room temperature. The sequence and modifications are shown below.

#### 1. RNA/DNA construct with an overhanging tail of (rA)<sub>15</sub> used for polymerization assays.

3'- poly 15rA degradation RNA strand:  
5'- rUrGrG rCrGrA rCrGrG  
rCrArG rCrGrA rGrGrC rArArA  
rArArA rArArA rArArA rArArA-  
3'

DNA complementary strand:  
5' -/Cy5/- GCC TCG CTG CCG  
TCG CCA /Biotin/ -3'

#### 2. RNA/DNA construct with an overhanging tail of (rA)<sub>30</sub> used for degradation and polymerization assays.

3'-poly 30rA degradation RNA strand:

5'-rUrGrG rCrGrA rCrGrG  
rCrArG rCrGrA rGrGrC rArArA  
rArArA rArArA rArArA rArArA  
rArArA rArArA rArArA rArArA  
rArArA-3'

DNA complementary strand:

5'-/Cy5/- GCC TCG CTG CCG  
TCG CCA /Biotin/ -3'

### 3. RNA strand for gel degradation assays.

5'-/Cy3/- rArArA rArArA  
rArArA rArArA rArArA rArArA  
rArArA rArArA rArArA rArArA  
-3'

### 4. Oligonucleotides used to make the Rrp41 mutant for the protein labeling.

The mutations introduced are marked in bold.

afRrp41\_C43A\_for CTGACGGGTCT  
**GCG** TACCTTGAAATG  
afRrp41\_C43A\_rev CATTTC AAGGTA  
**CGC** AGACCCGTCAG  
afRrp41\_C140S\_for GCAGGACAGCC  
**AGT** CTGAATGCTGC  
afRrp41\_C140S\_rev GCAGCATT CAG  
**ACT** GGCTGTCCTGC  
afRrp41\_Cys\_STOP\_Hind\_rev TTTTT  
**AAGCTT** TCA **GCA**  
GGCATCTTCACC

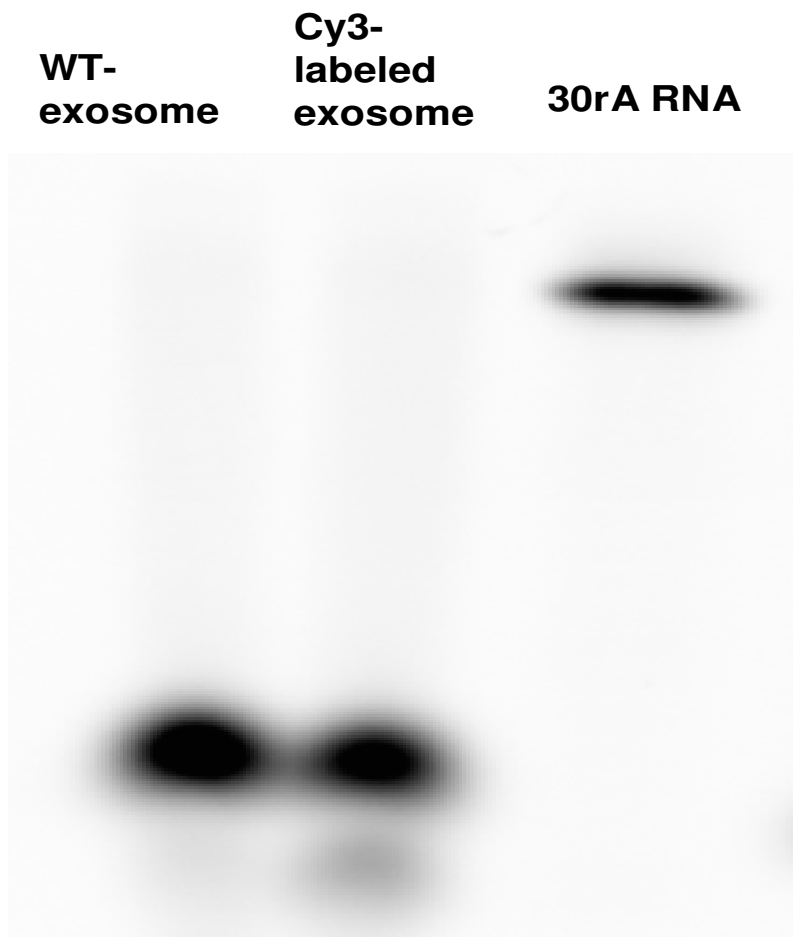

**Figure S1.** A comparison of RNA degradation activity between the wild type (WT) exosome and the Cy3-labeled exosome mutant. Cysteine engineering and fluorescent labeling do not significantly influence the activity of exosome because both produced the same degradation product. In the degradation assay, 20 pmol protein was incubated with 85 pmol of a 30rA RNA strand labeled with Cy3 at the 5' end in a 50 $\mu$ l buffer containing 20 mM Tris (pH 7.8), 60mM KCl, 10 mM MgCl<sub>2</sub>, 2mM DTT, 50  $\mu$ g/ml BSA and 10mM P<sub>i</sub> for 2 min at 22°C.

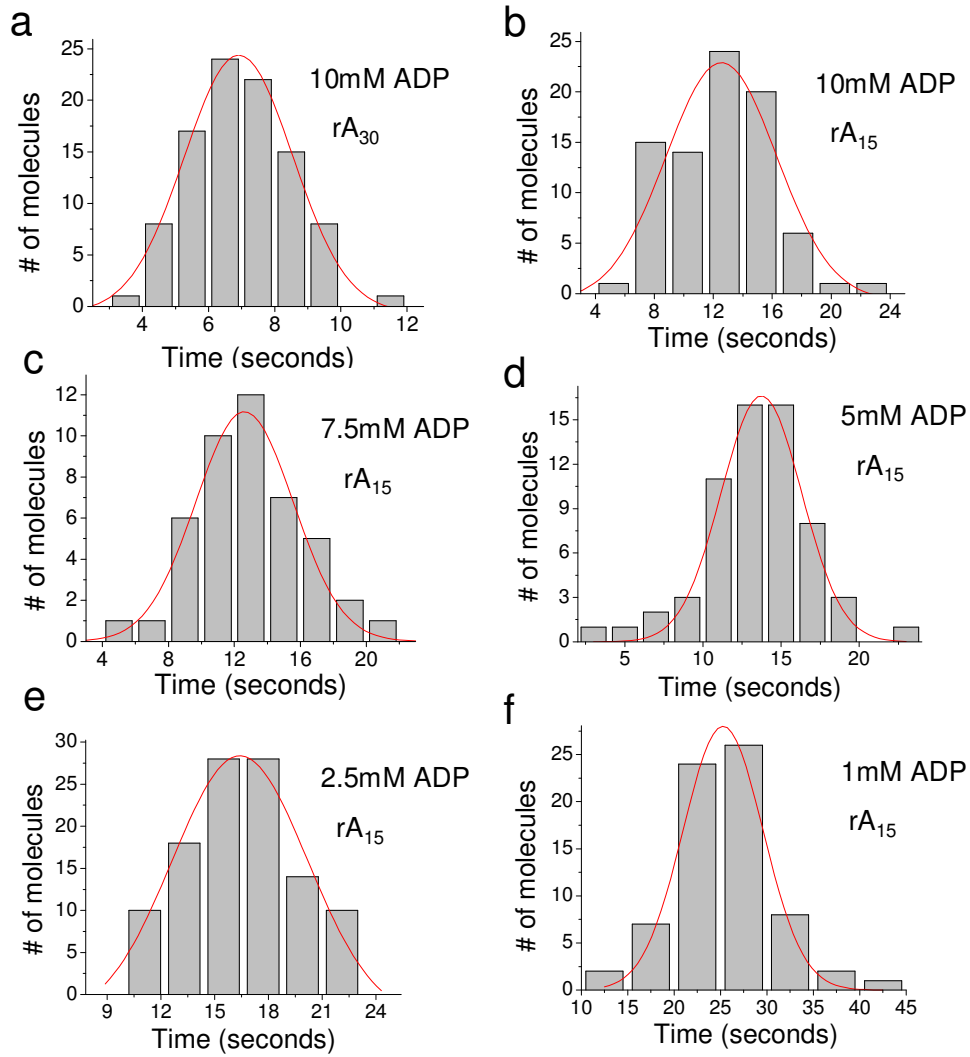

**Figure S2.** Histograms of polymerization times obtained at various ADP concentrations. (a) 30 nt overhang RNA at 10 mM ADP. (b-f) 15nt overhang RNA at the indicated ADP concentrations.

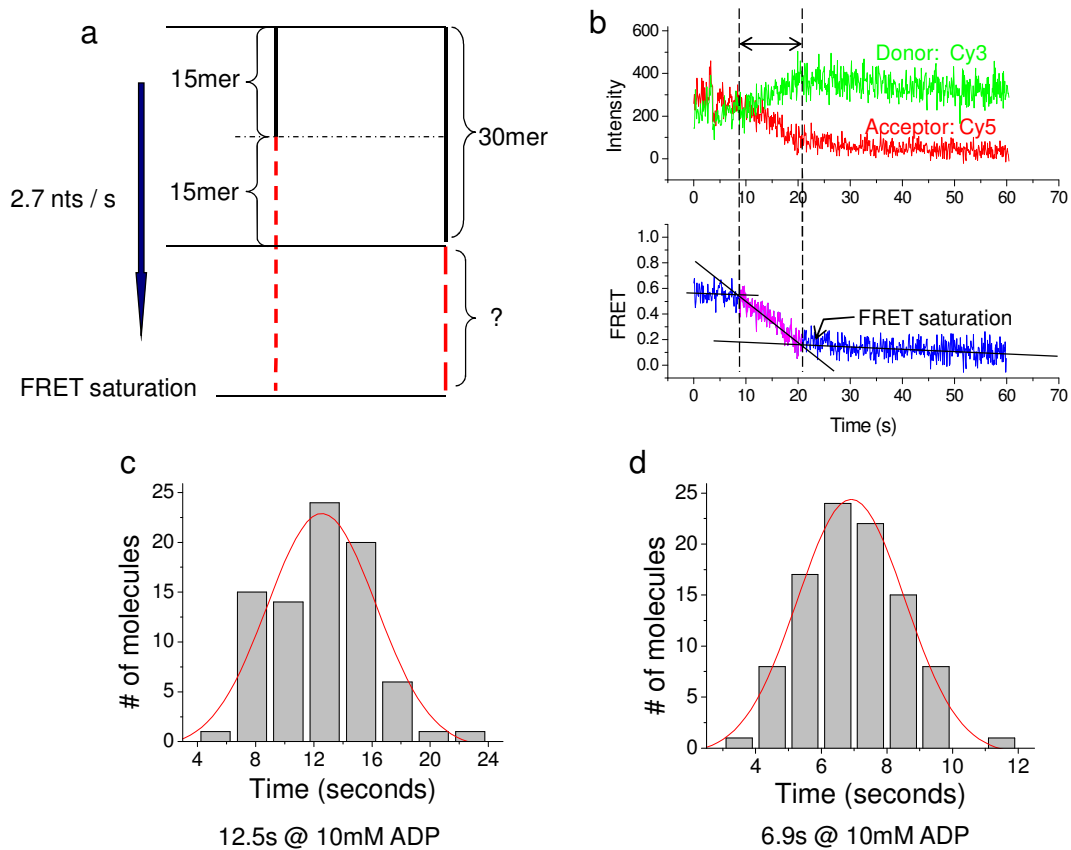

**Figure S3.** Determination of polymerization rate. **(a)** The reaction time was measured from the time period of FRET decrease as shown in **b** for two RNA constructs (15 and 30 nt 3' ssRNA tails). The difference in time between the two RNA constructs should correspond to the synthesis time of 15 nt (length difference: 30 nt – 15 nt). **(b)** An exemplary single molecule record shows the period of FRET decrease which corresponds to the reaction time (black arrow). **(c)** Histogram of reactions times obtained from the 15 nt overhang RNA. **(d)** Histogram of reaction times obtained from the 30 nt overhang RNA. Gaussian fits were used to calculate the mean values of the reaction time.

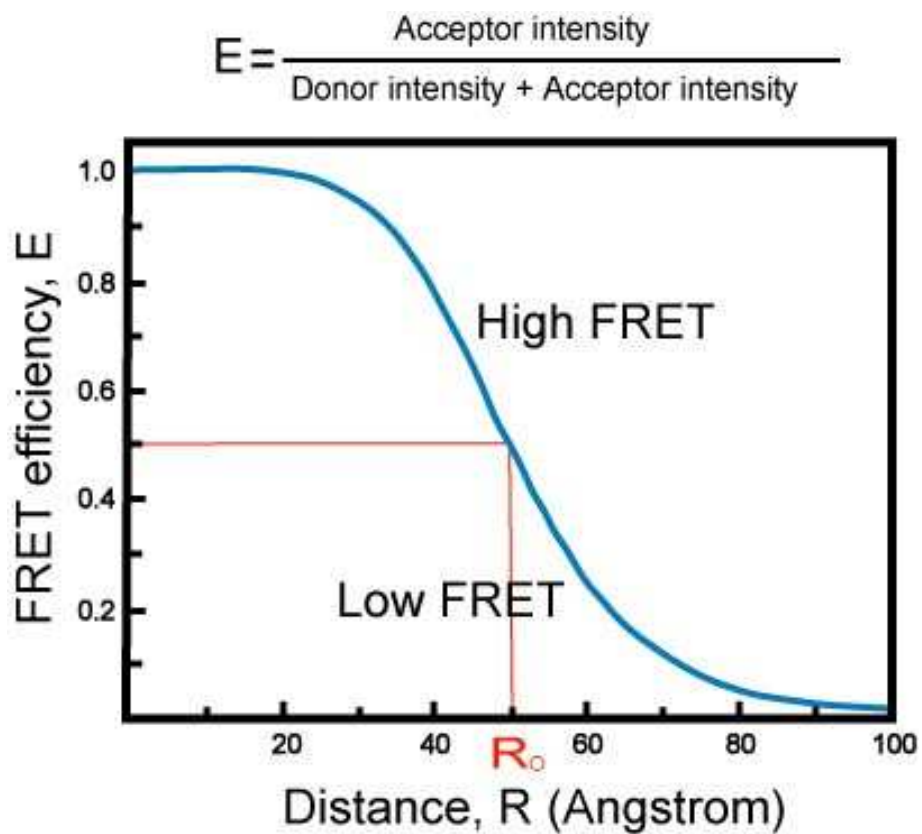

**Figure S4.** FRET efficiency as a function of distance (R) between the donor and the acceptor, where  $E=0.5$  at  $R=R_0$  assuming  $R_0=50\text{\AA}$ . FRET efficiency is sensitive only between 2 and 8 nanometers.

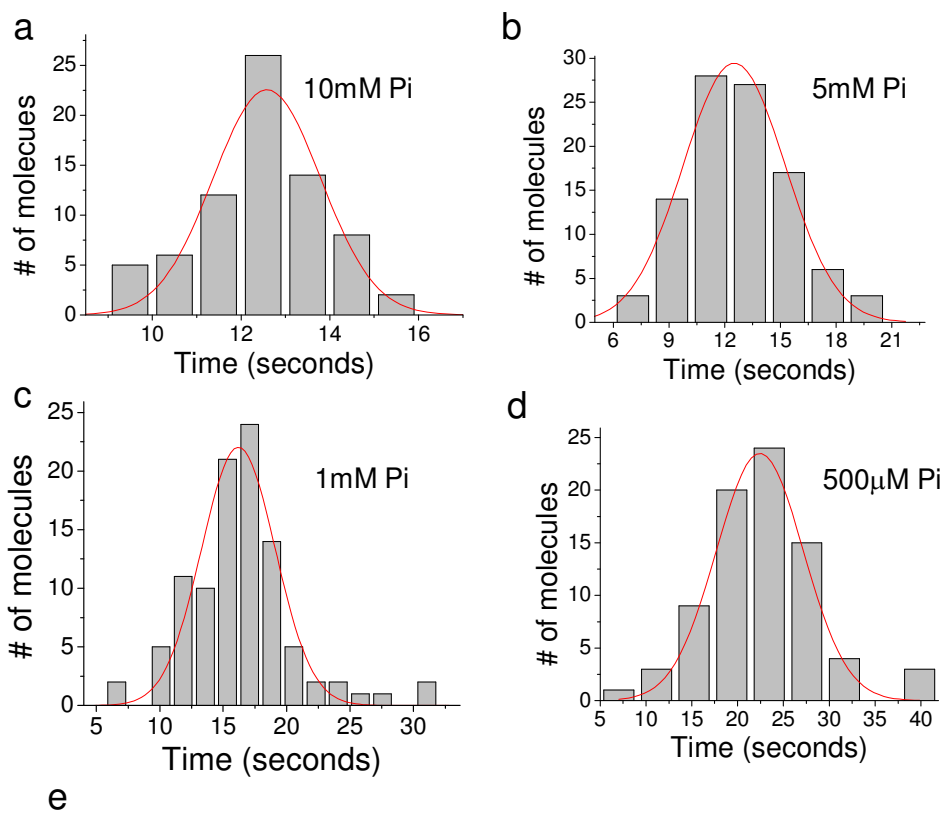

72.9 s  $\pm$  2.5  
 100µM Pi (26 molecules)

**Figure S5.** Histograms of degradation times obtained at the indicated various  $P_i$  concentrations (**a-d**). Gaussian fits were used to calculate the mean values of the reaction time. (**e**) The yield at 100 µM  $P_i$  was too low for histogram-based analysis. Therefore, we simply calculated the mean degradation time was determined from 26 molecules with a standard deviation of 2.5 s.

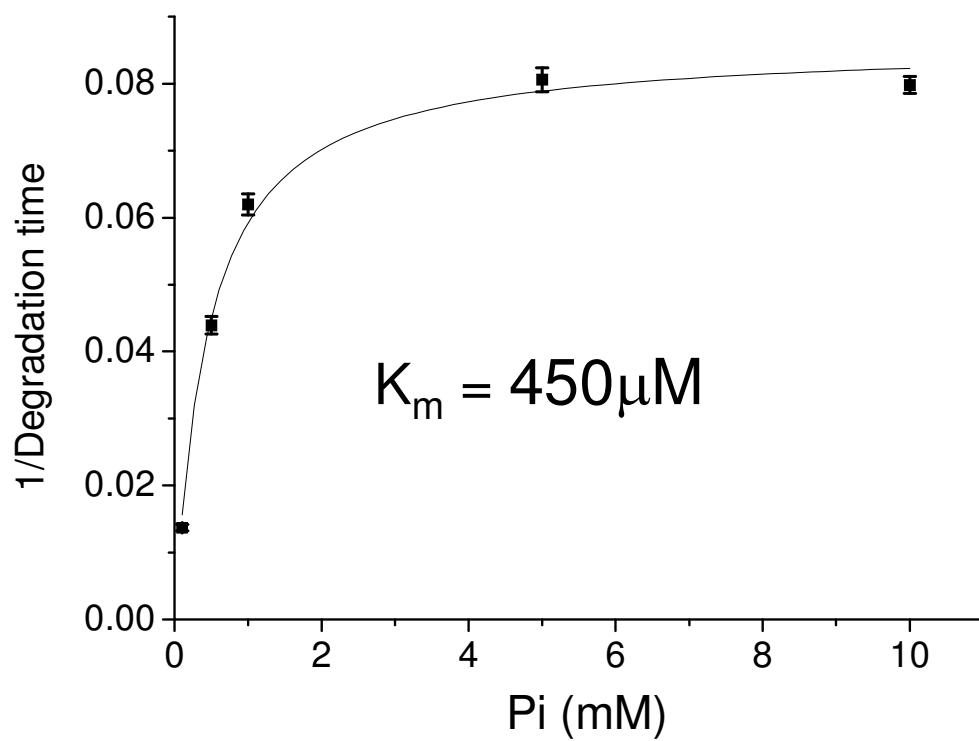

**Figure S6.** The inverse of average  $\Delta t$ ,  $(t_{\text{avg}})^{-1}$ , of degradation reaction was plotted against  $P_i$  concentration and then fitted to the Michaelis-Menten equation. The  $P_i$  concentration of half maximum velocity ( $K_m$ ) was  $450 \mu\text{M}$ .



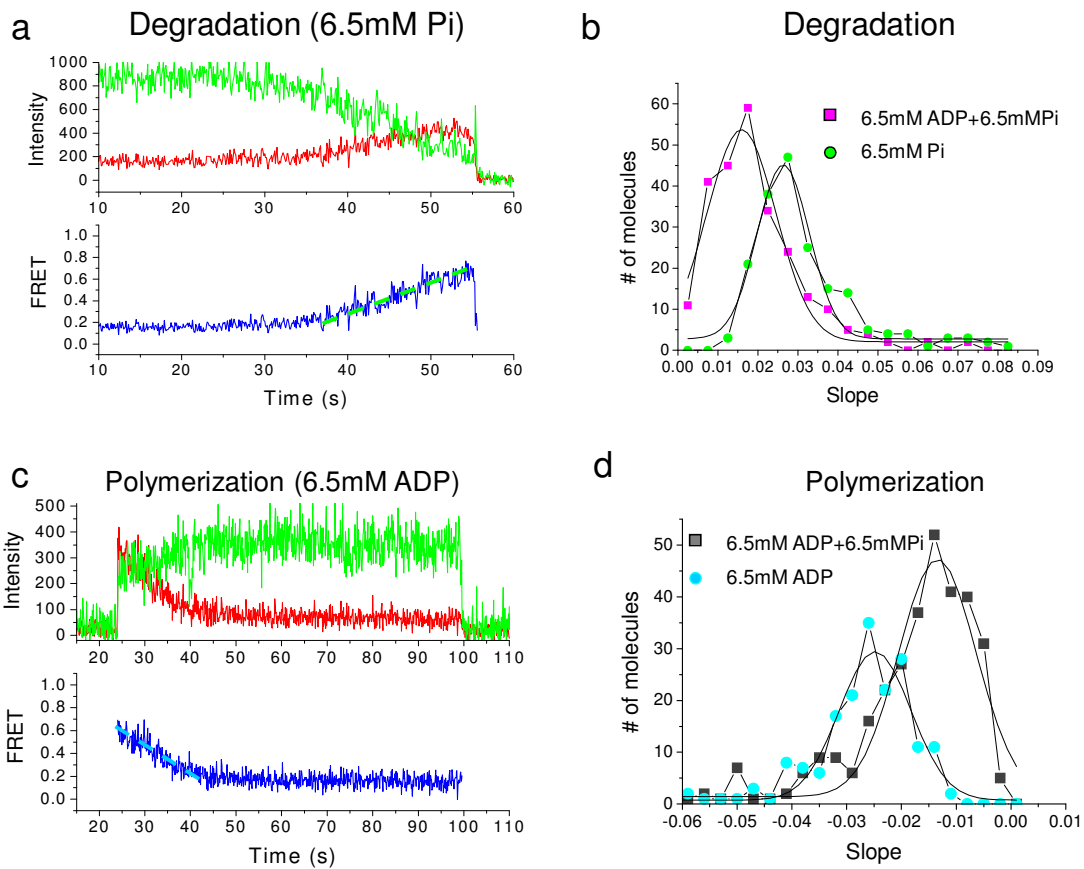

**Figure S7.** Speed of reaction at 6.5mM  $P_i$  only, 6.5mM ADP only and their mixture. **(a)** A representative FRET time trace at 6.5 mM  $P_i$  concentration. **(b)** A comparison of degradation speed for 6.5 mM  $P_i$  only and 6.5 mM of the mixture of both  $P_i$  and ADP. **(c)** A representative FRET time trace at 6.5 mM ADP. **(d)** A comparison of polymerization speed for 6.5 mM ADP only and 6.5 mM of the mixture of both  $P_i$  and ADP.
